# Supplementary material for: Circulating Fatty Acids and Risk of Coronary Heart Disease and Stroke: Individual Participant Data Meta‐Analysis in Up to 16 126 Participants
Source: PubMed Central journal article supplement (PMC7335585; doi:10.1161/jaha.119.013131), 2020-03-02
Supplement: JAH3-9-e013131-s001.pdf [file JAH3-9-e013131-s001.pdf]

# **SUPPLEMENTAL MATERIAL**

### Appendix S1. List of additional UCLEB members

| First Name | Last Name  | Affiliation                                                                                                                                         |
|------------|------------|-----------------------------------------------------------------------------------------------------------------------------------------------------|
| Pimphen    | Charoen    | Farr Institute of Health Informatics, University College London, London, United Kingdom                                                             |
| Jackie     | Cooper     | Centre for Cardiovascular Genetics, Dept. of Medicine, University College London, UK                                                                |
| Fotios     | Drenos     | Centre for Cardiovascular Genetics, Dept. of Medicine, University College London, UK                                                                |
| Frank      | Dudbridge  | Department of Health Sciences, Centre for Medicine, University of Leicester, Leicester, UK                                                          |
| Jorgen     | Engmann    | Institute of Cardiovascular Science and Farr Institute, University College London, London, United Kingdom                                           |
| Ghazaleh   | Fatemifar  | Farr Institute of Health Informatics, University College London, London, United Kingdom                                                             |
| Chris      | Finan      | Genetic Epidemiology Group, Institute of Cardiovascular Science, University College London, UK                                                      |
| Victoria   | Garfield   | Department of Epidemiology & Public Health, UCL Institute of Epidemiology & Health Care, University College London, UK                              |
| Alun       | Hughes     | Cardiometabolic Phenotyping Group, Institute of Cardiovascular Science, University College London, UK                                               |
| Steve      | Humphries  | Centre for Cardiovascular Genetics, Dept. of Medicine, University College London, UK                                                                |
| Elina      | Hypponen   | MRC Centre of Epidemiology for Child Health, Department of Population Health Sciences, UCL Institute of Child Health, University College London, UK |
| Diana      | Kuh        | MRC Unit for Lifelong Health and Ageing, London, UK                                                                                                 |
| Claudia    | Langenberg | Department of Epidemiology & Public Health, UCL Institute of Epidemiology & Health Care, University College London, UK                              |
| Stela      | McLachlan  | Centre for Population Health Sciences, The Usher Institute of Population Health Sciences and Informatics, University of Edinburgh, UK               |
| Vincent    | Plagnol    | University College London Genetics Institute, Department of Genetics, Environment and Evolution, London, UK                                         |
| Christine  | Power      | MRC Centre of Epidemiology for Child Health, Department of Population Health Sciences, UCL Institute of Child Health, London, UK                    |
| Jackie     | Price      | Centre for Population Health Sciences, The Usher Institute of Population Health Sciences and Informatics, University of Edinburgh, UK               |
| Tina       | Shah       | Genetic Epidemiology Group, Institute of Cardiovascular Science, University College London, UK                                                      |
| Reecha     | Sofat      | Centre for Clinical Pharmacology, University College London, London, UK                                                                             |
| Philippa   | Talmud     | Centre for Cardiovascular Genetics, Dept. of Medicine, University College London, UK                                                                |
| Ann        | Walker     | Centre for Cardiovascular Genetics, Dept. of Medicine, University College London, UK                                                                |
| Peter      | Whincup    | Population Health Research Institute, St George's, University of London, UK                                                                         |
| John       | Whittaker  | Genetics Division, Research and Development, GlaxoSmithKline, Harlow, UK                                                                            |
| Andrew     | Wong       | MRC Unit for Lifelong Health and Ageing, London, UK                                                                                                 |

## Data S1. SUPPLEMENTARY METHODS

### Nuclear magnetic resonance (NMR) spectroscopy platform

The quantified metabolic measures were obtained per sample of EDTA-plasma, using a 1D proton (<sup>1</sup>H) NMR spectroscopy-based platform described previously<sup>1-4</sup>. Briefly, the serum samples were stored in a freezer at -80°C. The frozen samples were first slowly thawed in a refrigerator (+4°C) overnight prior to metabolomics profiling. 260 µL plasma and 260 µL sodium phosphate buffer (75 mM Na<sub>2</sub>HPO<sub>4</sub>, 0.08% sodium 3-(trimethylsilyl)propionate-2,2,3,3-d<sub>4</sub>, 0.04% sodium azide in 80%/20% H<sub>2</sub>O/D<sub>2</sub>O, pH 7.4) were mixed and transferred to NMR tubes using an 8-channel, Varispan Janus liquid handling robot (PerkinElmer). NMR spectra were acquired using a Bruker Avance III HD 500MHz spectrometer with a room temperature 5mm, inverse triple resonance TXI probe and a Bruker Avance III HD 600MHz spectrometer equipped with a nitrogen-cooled triple resonance probe (CryoProbe Prodigy TCI). Both spectrometers were equipped with SampleJet auto-samplers with cooled (6°C) sample storage. Spectra were acquired using standardized parameters using three NMR experiments or 'molecular windows' to characterize lipoproteins, low molecular weight metabolites and lipids. Lipid spectra were acquired after a standardised lipid extraction procedure performed on each sample using a VIAFLO 96 channel electronic pipette (Integra Biosciences). The quantified fatty acids used in this study correspond to all forms of fatty acids present in the circulation (i.e. all the fatty acids in triglycerides, phospholipids, or cholesterol esters, or as free fatty acids). Data pre-processing and quantification were as previously described<sup>1-4</sup>. The NMR spectra were analysed for absolute quantification using regression models<sup>5</sup>. There is a high analytical consistency, in epidemiological settings, between metabolic measures quantified by the NMR metabolomics platform and the concentrations obtained from routine clinical chemistry<sup>6</sup>, and other analytical methods, such as gas chromatography<sup>6, 7</sup> and enzymatic method<sup>6</sup>, with correlations >0.9. In addition, the consistency of biomarker associations with disease incidence for metabolic traits quantified by NMR and two widely used mass spectroscopy platforms has been demonstrated<sup>6, 7</sup>.

**SUPPLEMENTARY TABLES AND FIGURES**

**Table S1.** Distribution of fatty acids (mean and standard error) according to coronary heart disease (CHD) status and study

|               | BWHHS       |             | BRHS        |             | WHII        |             | SABRE       |             | CaPS        |             | UKCTOCS     |             |
|---------------|-------------|-------------|-------------|-------------|-------------|-------------|-------------|-------------|-------------|-------------|-------------|-------------|
|               | Cases       | Controls    | Cases       | Controls    | Cases       | Controls    | Cases       | Controls    | Cases       | Controls    | Cases       | Controls    |
| DHA (mmol/L)  | 0.3 (0.09)  | 0.3 (0.08)  | 0.15 (0.05) | 0.16 (0.06) | 0.19 (0.06) | 0.19 (0.07) | 0.14 (0.04) | 0.14 (0.04) | 0.12 (0.04) | 0.11 (0.04) | 0.18 (0.06) | 0.2 (0.07)  |
| LA (mmol/L)   | 3.77 (0.92) | 3.77 (0.8)  | 3.02 (0.66) | 2.99 (0.64) | 3.45 (0.65) | 3.33 (0.64) | 2.8 (0.62)  | 2.77 (0.6)  | 2.6 (0.68)  | 2.46 (0.67) | 3.09 (0.72) | 3.22 (0.69) |
| MUFA (mmol/L) | 3.44 (1.25) | 3.06 (1.08) | 3.1 (0.87)  | 3.01 (0.85) | 3.26 (0.86) | 2.97 (0.86) | 2.47 (0.75) | 2.4 (0.71)  | 2.85 (0.98) | 2.66 (0.97) | 3.72 (1.15) | 3.56 (1.07) |
| SFA (mmol/L)  | 5.08 (1.37) | 4.88 (1.17) | 4.22 (0.93) | 4.16 (0.87) | 4.92 (0.93) | 4.64 (0.96) | 3.92 (1.66) | 3.77 (1.56) | 4.21 (1.01) | 3.99 (1.04) | 4.85 (1.19) | 4.84 (1.13) |

Results based on complete case analysis (N = 3,022 CHD cases and 13,104 controls). DHA: docosahexaenoic acid; LA: linoleic acid; MUFA: monounsaturated fatty acids; SFA: saturated fatty acids. BWHHS: British Women's Heart and Health Study; BRHS: British Regional Heart Study; WHII: Whitehall-II Study; SABRE: Southall And Brent REvisited cohort; UKCTOCS: United Kingdom Collaborative Trial of Ovarian Cancer Screening; CaPS: Caerphilly Prospective Study; CHD: coronary heart disease.

**Table S2.** Distribution of fatty acids (mean and standard error) according to stroke status and study

|               | BWHHS       |             | BRHS        |             | WHII        |             | SABRE       |             | CaPS        |             | UKCTOCS     |             |
|---------------|-------------|-------------|-------------|-------------|-------------|-------------|-------------|-------------|-------------|-------------|-------------|-------------|
|               | Cases       | Controls    | Cases       | Controls    | Cases       | Controls    | Cases       | Controls    | Cases       | Controls    | Cases       | Controls    |
| DHA (mmol/L)  | 0.3 (0.09)  | 0.3 (0.08)  | 0.15 (0.06) | 0.16 (0.06) | 0.19 (0.08) | 0.19 (0.07) | 0.14 (0.04) | 0.14 (0.04) | 0.12 (0.05) | 0.11 (0.04) | 0.19 (0.06) | 0.19 (0.06) |
| LA (mmol/L)   | 3.74 (0.84) | 3.77 (0.81) | 2.87 (0.66) | 3 (0.64)    | 3.08 (0.66) | 3.34 (0.64) | 2.69 (0.64) | 2.79 (0.6)  | 2.47 (0.63) | 2.5 (0.68)  | 3.06 (0.7)  | 3.19 (0.69) |
| MUFA (mmol/L) | 3.21 (1.27) | 3.08 (1.09) | 2.94 (0.83) | 3.02 (0.85) | 2.81 (0.79) | 2.98 (0.86) | 2.48 (0.76) | 2.41 (0.71) | 2.77 (1.02) | 2.7 (0.97)  | 3.53 (1.12) | 3.48 (1.03) |
| SFA (mmol/L)  | 4.98 (1.37) | 4.89 (1.18) | 4.04 (0.92) | 4.18 (0.87) | 4.44 (0.9)  | 4.66 (0.96) | 3.88 (2.01) | 3.79 (1.51) | 4.06 (0.99) | 4.04 (1.05) | 4.69 (1.12) | 4.78 (1.07) |

Results based on complete case analysis (N = 1,606 stroke cases and 13,369 controls). DHA: docosahexaenoic acid; LA: linoleic acid; MUFA: monounsaturated fatty acids; SFA: saturated fatty acids. BWHHS: British Women's Heart and Health Study; BRHS: British Regional Heart Study; WHII: Whitehall-II Study; SABRE: Southall And Brent REvisited cohort; UKCTOCS: United Kingdom Collaborative Trial of Ovarian Cancer Screening; CaPS: Caerphilly Prospective Study; CHD: coronary heart disease.

**Table S3.** Association of blood fatty acids concentration with demographic and lifestyle factors

|                  | N<br>(range)  | DHA   |        |      |                |      | LA     |       |                |       |        | MUFA  |                |       |        |    | SFA            |       |       |       |    |
|------------------|---------------|-------|--------|------|----------------|------|--------|-------|----------------|-------|--------|-------|----------------|-------|--------|----|----------------|-------|-------|-------|----|
|                  |               | Beta  | 95% CI | p    | I <sup>2</sup> | Beta | 95% CI | p     | I <sup>2</sup> | Beta  | 95% CI | p     | I <sup>2</sup> | Beta  | 95% CI | p  | I <sup>2</sup> |       |       |       |    |
| Non-European     | 19,928-20,025 | -0.02 | -0.46  | 0.42 | 0.925          | 95   | 0.15   | 0.08  | 0.21           | 6E-06 | 0      | -0.42 | -0.67          | -0.17 | 0.001  | 83 | -0.25          | -0.44 | -0.06 | 0.009 | 70 |
| Age (> 65 years) | 20,047-20,144 | 0.11  | 0.03   | 0.18 | 0.006          | 78   | -0.01  | -0.08 | 0.05           | 0.731 | 69     | -0.02 | -0.07          | 0.04  | 0.522  | 55 | -0.02          | -0.08 | 0.05  | 0.607 | 66 |
| Ever smokers     | 14,828-14,888 | -0.05 | -0.28  | 0.17 | 0.642          | 96   | -0.11  | -0.16 | -0.07          | 1E-07 | 0      | 0.30  | 0.22           | 0.37  | 3E-13  | 70 | 0.12           | 0.04  | 0.21  | 0.006 | 76 |
| Alcohol drinkers | 14,906-14,965 | 0.35  | 0.2    | 0.49 | 3E-06          | 92   | -0.08  | -0.12 | -0.04          | 7E-05 | 0      | 0.18  | 0.00           | 0.35  | 0.053  | 95 | 0.11           | 0.05  | 0.17  | 0.001 | 56 |
| Overweight/obese | 19,402-19,498 | 0.04  | -0.03  | 0.11 | 0.270          | 83   | 0.02   | -0.04 | 0.08           | 0.475 | 72     | 0.37  | 0.29           | 0.45  | 0.000  | 87 | 0.26           | 0.15  | 0.38  | 9E-06 | 94 |

Beta: study- and sex-specific standard deviation units of blood fatty acids concentration according to study covariates. DHA: docosahexaenoic acid; LA: linoleic acid; MUFA: monounsaturated fatty acids; SFA: saturated fatty acids.

**Table S4.** Correlation across circulating fatty acids

|      | DHA   |      |      |       |      |         | LA    |      |      |       |      |         | MUFA  |      |      |       |      |         |
|------|-------|------|------|-------|------|---------|-------|------|------|-------|------|---------|-------|------|------|-------|------|---------|
|      | BWHHS | BRHS | WHII | SABRE | CaPS | UKCTOCS | BWHHS | BRHS | WHII | SABRE | CaPS | UKCTOCS | BWHHS | BRHS | WHII | SABRE | CaPS | UKCTOCS |
| DHA  | 1     | 1    | 1    | 1     | 1    | 1       |       |      |      |       |      |         |       |      |      |       |      |         |
| LA   | 0.49  | 0.36 | 0.28 | 0.36  | 0.40 | 0.32    | 1     | 1    | 1    | 1     | 1    | 1       |       |      |      |       |      |         |
| MUFA | 0.36  | 0.36 | 0.40 | 0.42  | 0.45 | 0.30    | 0.42  | 0.45 | 0.51 | 0.38  | 0.43 | 0.51    | 1     | 1    | 1    | 1     | 1    | 1       |
| SFA  | 0.52  | 0.45 | 0.42 | 0.25  | 0.53 | 0.37    | 0.67  | 0.70 | 0.71 | 0.16  | 0.71 | 0.68    | 0.82  | 0.86 | 0.88 | 0.50  | 0.86 | 0.88    |

Pearson's correlation coefficient (all P-values < 0.0001).

**Table S5.** Pooled estimates and heterogeneity metrics for meta-analysis of the association of circulating fatty acids with risk of coronary heart disease

| Fatty acid | Model | OR   | OR - 95% CI |      | P     | Cochrane's Q | df | P for Cochrane's Q | I <sup>2</sup> | I <sup>2</sup> - 95% reference interval* |    |
|------------|-------|------|-------------|------|-------|--------------|----|--------------------|----------------|------------------------------------------|----|
| DHA        | M0    | 0.92 | 0.82        | 1.04 | 0.206 | 30           | 5  | 1.21E-05           | 84             | 66                                       | 92 |
| DHA        | M1    | 0.94 | 0.82        | 1.07 | 0.340 | 32           | 5  | 4.80E-06           | 85             | 68                                       | 93 |
| DHA        | M2    | 0.85 | 0.76        | 0.95 | 0.005 | 17           | 5  | 0.005              | 70             | 29                                       | 87 |
| LA         | M0    | 1.05 | 0.92        | 1.20 | 0.480 | 40           | 5  | 1.48E-07           | 88             | 75                                       | 94 |
| LA         | M1    | 1.05 | 0.92        | 1.20 | 0.451 | 40           | 5  | 1.87E-07           | 87             | 75                                       | 94 |
| LA         | M2    | 1.01 | 0.87        | 1.18 | 0.854 | 24           | 5  | 2.36E-04           | 79             | 54                                       | 90 |
| MUFA       | M0    | 1.20 | 1.12        | 1.28 | 2E-07 | 11           | 5  | 0.047              | 55             | 0                                        | 82 |
| MUFA       | M1    | 1.18 | 1.13        | 1.24 | 4E-13 | 4            | 5  | 0.609              | 0              | 0                                        | 75 |
| MUFA       | M2    | 1.36 | 1.15        | 1.61 | 4E-04 | 17           | 5  | 0.005              | 70             | 31                                       | 87 |
| SFA        | M0    | 1.12 | 1.05        | 1.20 | 0.001 | 12           | 5  | 0.035              | 58             | 0                                        | 83 |
| SFA        | M1    | 1.12 | 1.05        | 1.20 | 0.001 | 10           | 5  | 0.065              | 52             | 0                                        | 81 |
| SFA        | M2    | 0.94 | 0.82        | 1.09 | 0.421 | 9            | 5  | 0.100              | 46             | 0                                        | 79 |

Model 0 (M0): unadjusted model; Model 1 (M1): adjusted for recruitment place, demographic and lifestyle variables (age, sex, non-European ancestry, smoking, alcohol and body mass index); Model 2 (M2): adjusted for variables in M1 plus other fatty acids. DHA: docosahexaenoic acid; LA: linoleic acid; MUFA: monounsaturated fatty acids; SFA: saturated fatty acids. \* I<sup>2</sup> and its 95% reference interval were estimated as proposed by Higgins et al<sup>8</sup>.



**Table S6.** Pooled estimates and heterogeneity metrics for meta-analysis of the association of circulating fatty acids with risk of stroke

| Fatty acid | Model | OR   | OR - 95% CI | P    | Cochrane's Q | df  | P for Cochrane's Q | I <sup>2</sup> | I <sup>2</sup> - 95% reference interval* |    |
|------------|-------|------|-------------|------|--------------|-----|--------------------|----------------|------------------------------------------|----|
| DHA        | M0    | 0.93 | 0.87        | 0.99 | 0.022        | 4.0 | 5                  | 0.554          | 0                                        | 75 |
| DHA        | M1    | 0.93 | 0.87        | 0.99 | 0.016        | 4.8 | 5                  | 0.447          | 0                                        | 75 |
| DHA        | M2    | 0.95 | 0.89        | 1.02 | 0.165        | 3.4 | 5                  | 0.641          | 0                                        | 75 |
| LA         | M0    | 0.85 | 0.78        | 0.92 | 1E-04        | 8.4 | 5                  | 0.136          | 40                                       | 76 |
| LA         | M1    | 0.85 | 0.78        | 0.93 | 2E-04        | 8.7 | 5                  | 0.124          | 42                                       | 77 |
| LA         | M2    | 0.82 | 0.75        | 0.90 | 3E-05        | 5.7 | 5                  | 0.339          | 12                                       | 78 |
| MUFA       | M0    | 1.03 | 0.96        | 1.12 | 0.405        | 7.6 | 5                  | 0.182          | 34                                       | 73 |
| MUFA       | M1    | 1.04 | 0.98        | 1.11 | 0.186        | 5.2 | 5                  | 0.390          | 4                                        | 76 |
| MUFA       | M2    | 1.22 | 1.03        | 1.44 | 0.022        | 9.4 | 5                  | 0.092          | 47                                       | 79 |
| SFA        | M0    | 0.96 | 0.88        | 1.04 | 0.308        | 9.1 | 5                  | 0.104          | 45                                       | 78 |
| SFA        | M1    | 0.96 | 0.89        | 1.04 | 0.353        | 7.0 | 5                  | 0.220          | 29                                       | 71 |
| SFA        | M2    | 0.94 | 0.79        | 1.11 | 0.451        | 7.6 | 5                  | 0.178          | 34                                       | 74 |

Model 0 (M0): unadjusted model; Model 1 (M1): adjusted for recruitment place, demographic and lifestyle variables (age, sex, non-European ancestry, smoking, alcohol and body mass index); Model 2 (M2): adjusted for variables in M1 plus other fatty acids. DHA: docosahexaenoic acid; LA: linoleic acid; MUFA: monounsaturated fatty acids; SFA: saturated fatty acids. \* I<sup>2</sup> and its 95% reference interval were estimated as proposed by Higgins et al <sup>8</sup>.

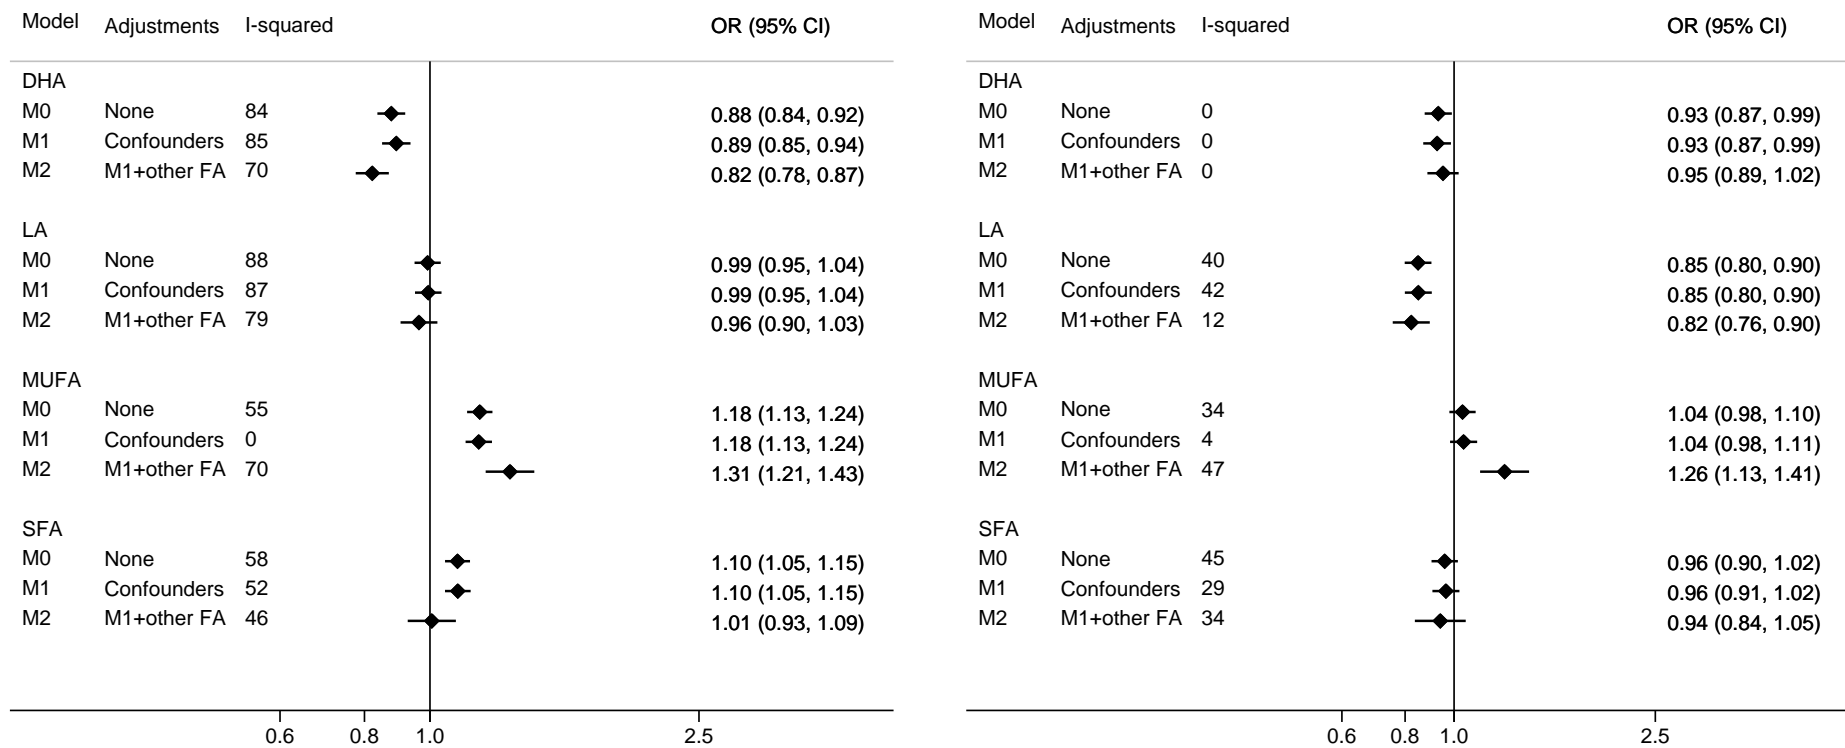

**Figure S1.** Odds ratio for coronary heart disease (CHD) and stroke according to blood fatty acids concentration (fixed effects meta-analysis)

Results were pooled using fixed effect meta-analysis and are expressed as odds ratio (and 95% confidence interval) per standard deviation unit increase in blood fatty acids concentration. Each standard unit corresponds to approximately 0.06 mmol/L for DHA, 0.7 for LA, 1.0 for MUFA, and 1.1 for SFA. Model 0 (M0): unadjusted model; Model 1 (M1): adjusted for recruitment place, demographic and lifestyle variables (age, sex, non-European ancestry, smoking, alcohol and body mass index); Model 2 (M2): adjusted for variables in M1 plus other fatty acids. DHA: docosahexaenoic acid; LA: linoleic acid; MUFA: monounsaturated fatty acids; SFA: saturated fatty acids; CHD: coronary heart disease.

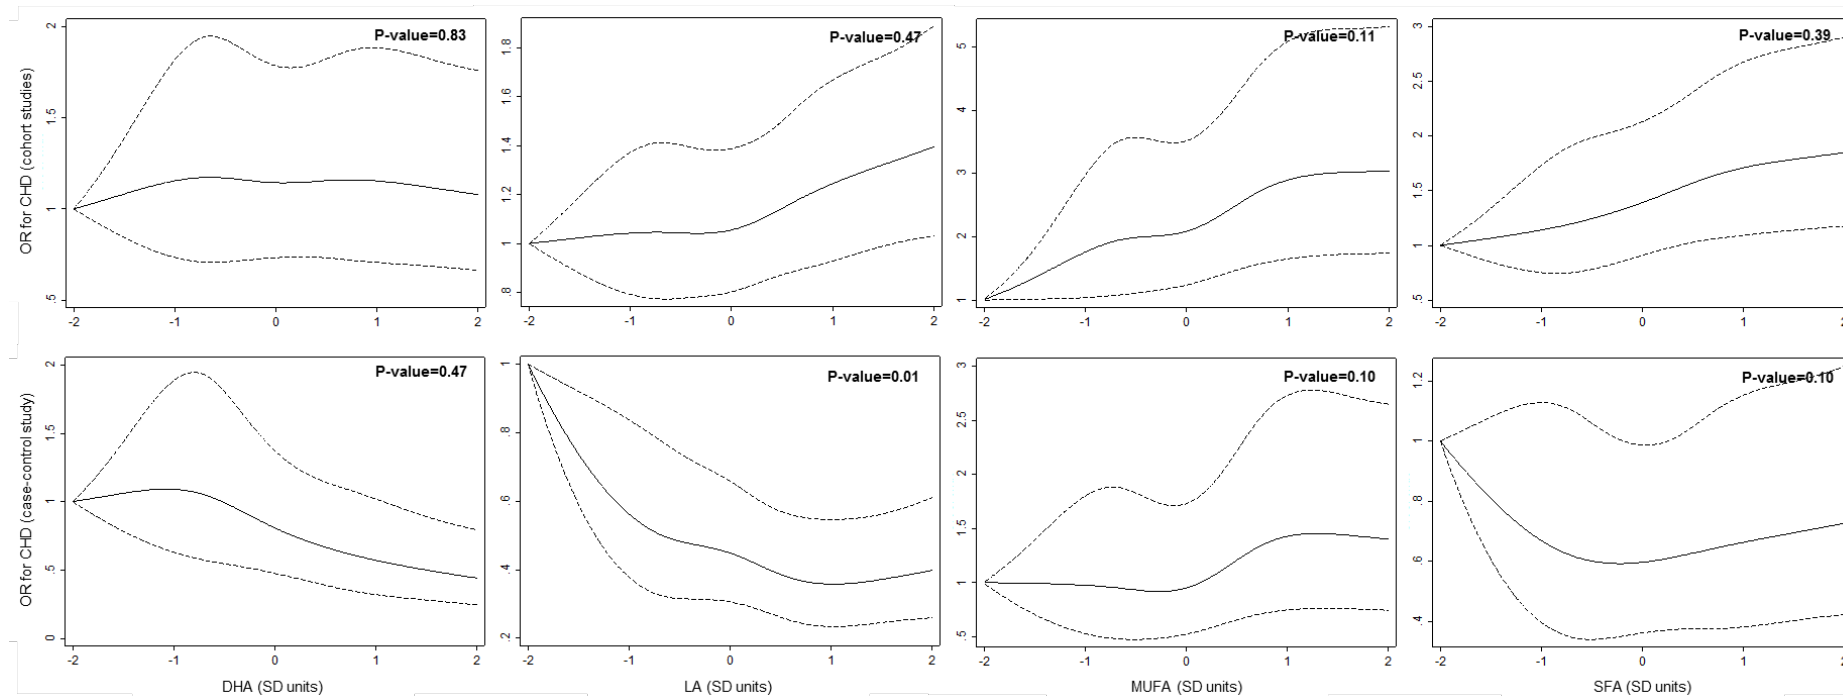

**Figure S2.** Dose-response curve for the association between blood fatty acids and coronary heart disease (CHD) risk

Results are expressed as odds ratio (and 95% confidence interval) according blood fatty acids concentration in standard deviation units. Each standard unit corresponds to approximately 0.06 mmol/L for DHA, 0.7 for LA, 1.0 for MUFA, and 1.1 for SFA. Models were adjusted for recruitment place, demographic and lifestyle variables (age, sex, non-European ancestry, smoking, alcohol and body mass index). P-value for the comparison between linear and nonlinear (restricted cubic spline) models were derived from the likelihood-ratio test. P-value threshold after Bonferroni correction =  $0.05/16 = 0.003$ . DHA: docosahexaenoic acid; LA: linoleic acid; MUFA: monounsaturated fatty acids; SFA: saturated fatty acids. The relations of the fatty acids with CHD risk were also modelled using blood fatty acids concentration in mmol/L (not in study-specific standard deviation units) and conclusions were the similar (cohort studies:  $P_{DHA} = 0.41$ ,  $P_{LA} = 0.32$ ,  $P_{MUFA} = 0.29$ ,  $P_{SFA} = 0.10$ ; case-control study:  $P_{DHA} = 0.46$ ,  $P_{LA} = 0.01$ ,  $P_{MUFA} = 0.05$ ,  $P_{SFA} = 0.09$ ).

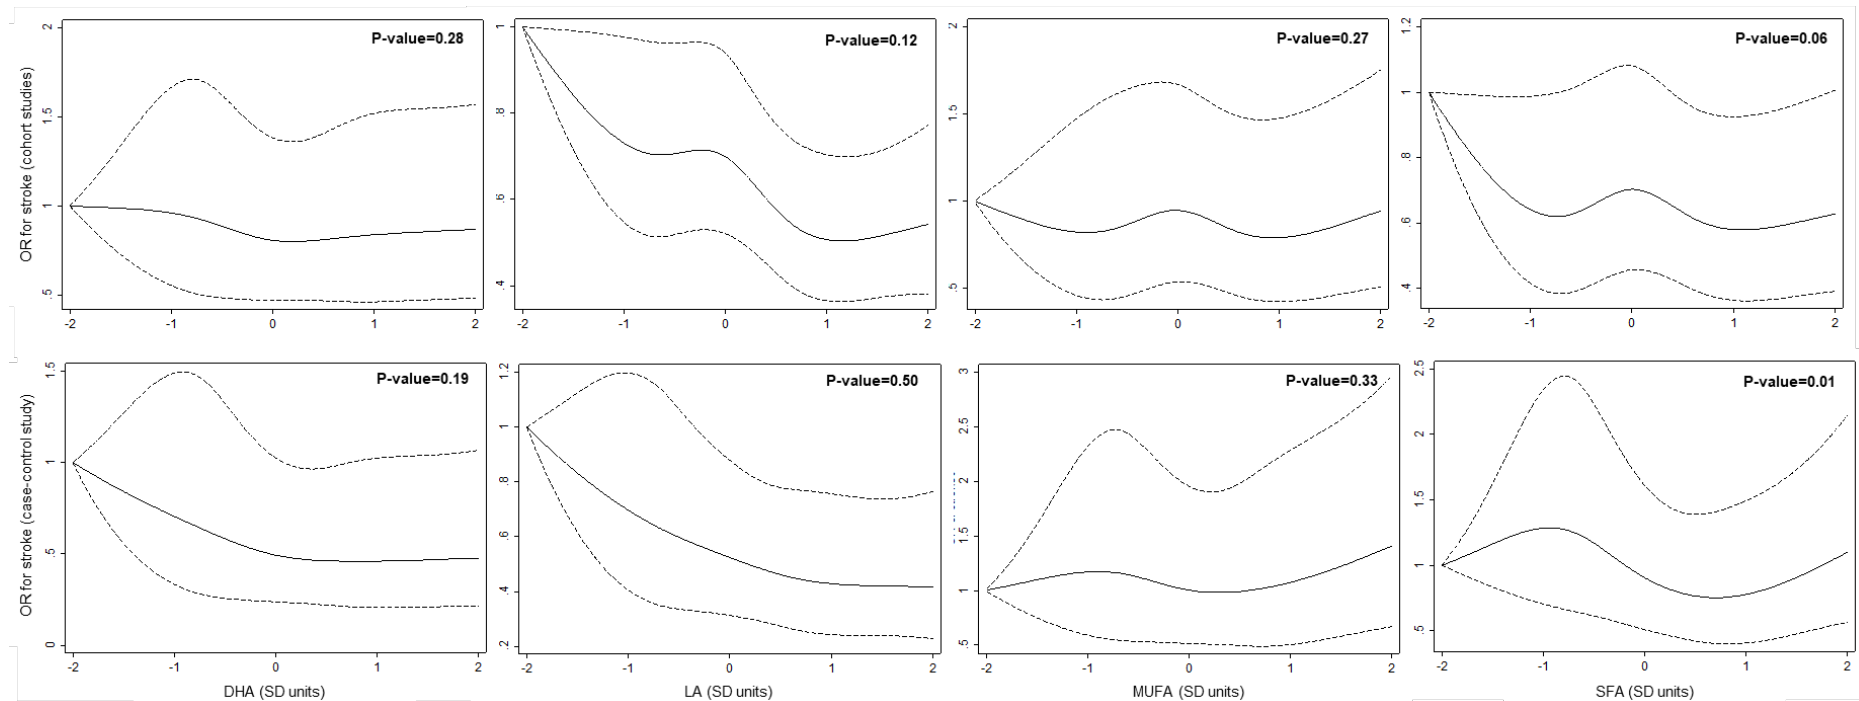

**Figure S3.** Dose-response curve for the association between blood fatty acids and stroke risk

Results are expressed as odds ratio (and 95% confidence interval) according blood fatty acids concentration in standard deviation units. Each standard unit corresponds to approximately 0.06 mmol/L for DHA, 0.7 for LA, 1.0 for MUFA, and 1.1 for SFA. Models were adjusted for recruitment place, demographic and lifestyle variables (age, sex, non-European ancestry, smoking, alcohol and body mass index). P-value for the comparison between linear and nonlinear (restricted cubic spline) models were derived from the likelihood-ratio test. P-value threshold after Bonferroni correction =  $0.05/16 = 0.003$ . DHA: docosahexaenoic acid; LA: linoleic acid; MUFA: monounsaturated fatty acids; SFA: saturated fatty acids. The relations of the fatty acids with stroke risk were also modelled using blood fatty acids concentration in mmol/L (not in study-specific standard deviation units) and conclusions were similar (cohort studies:  $P_{\text{DHA}} = 0.69$ ,  $P_{\text{LA}} = 0.12$ ,  $P_{\text{MUFA}} = 0.80$ ,  $P_{\text{SFA}} = 0.30$ ; case-control study:  $P_{\text{DHA}} = 0.22$ ,  $P_{\text{LA}} = 0.52$ ,  $P_{\text{MUFA}} = 0.30$ ,  $P_{\text{SFA}} = 0.01$ ).

**Table S7.** P-value for the association between the complete case indicator for CHD or stroke analyses and study variables

|                   | BWHHS            |                     | BRHS             |                     | WH2              |                     | SABRE            |                     | CaPS             |                     | UKCTOCS          |                     |
|-------------------|------------------|---------------------|------------------|---------------------|------------------|---------------------|------------------|---------------------|------------------|---------------------|------------------|---------------------|
|                   | P-value<br>(CHD) | P-value<br>(stroke) | P-value<br>(CHD) | P-value<br>(stroke) | P-value<br>(CHD) | P-value<br>(stroke) | P-value<br>(CHD) | P-value<br>(stroke) | P-value<br>(CHD) | P-value<br>(stroke) | P-value<br>(CHD) | P-value<br>(stroke) |
| Age (y)           | 8.83E-05         | 8.83E-05            | 0.33             | 0.33                | 0.61             | 0.09                | 0.01             | 3.57E-03            | 2.17E-04         | 2.17E-04            | 0.90             | 0.07                |
| Sex               | —                | —                   | —                | —                   | 0.47             | 0.49                | 5.04E-76         | 1.11E-74            | —                | —                   | —                | —                   |
| European ancestry | 0.93             | 0.93                | 0.41             | 0.41                | —                | —                   | 6.48E-36         | 1.30E-34            | —                | —                   | 0.17             | —                   |
| Smoking           | 1.55E-05         | 1.55E-05            | 0.82             | 0.82                | 2.67E-08         | 1.79E-05            | 0.69             | 0.63                | 0.95             | 0.95                | —                | —                   |
| Alcohol drinking  | 0.38             | 0.38                | 0.48             | 0.48                | 0.47             | 0.08                | 2.96E-21         | 6.20E-20            | 0.27             | 0.27                | —                | —                   |
| BMI               | 1.52E-05         | 1.52E-05            | 3.60E-04         | 3.60E-04            | 0.01             | 1.94E-03            | 4.74E-06         | 4.29E-06            | —                | —                   | 0.53             | 0.90                |
| DHA               | 3.47E-04         | 3.47E-04            | 8.18E-04         | 8.18E-04            | 0.53             | 0.67                | 0.15             | 0.32                | 9.90E-05         | 9.90E-05            | 8.39E-07         | 3.82E-05            |
| LA                | 3.06E-03         | 3.06E-03            | 0.25             | 0.25                | 0.63             | 0.55                | 0.16             | 0.11                | 0.96             | 0.96                | 3.20E-04         | 1.09E-07            |
| MUFA              | 1.17E-07         | 1.17E-07            | 1.04E-03         | 1.04E-03            | 0.05             | 0.05                | 0.95             | 0.78                | 0.35             | 0.35                | 2.01E-03         | 2.62E-05            |
| SFA               | 1.54E-06         | 1.54E-06            | 2.99E-03         | 2.99E-03            | 0.27             | 0.27                | 0.30             | 0.61                | 0.49             | 0.49                | 4.56E-05         | 1.02E-07            |
| CHD               | 0.03             | —                   | 0.89             | —                   | 0.16             | —                   | 1.69E-15         | —                   | 0.11             | —                   | 1.04E-04         | —                   |
| Stroke            | —                | 3.13E-03            | —                | 0.81                | —                | 0.59                | —                | 0.04                | —                | 0.57                | —                | 2.37E-03            |

**Table S8.** Odds ratio for coronary heart disease (CHD) and stroke according to blood fatty acids concentration after multiple imputation

|             | CHD  |              | Stroke |              |
|-------------|------|--------------|--------|--------------|
|             | OR   | 95% CI       | OR     | 95% CI       |
| <b>DHA</b>  |      |              |        |              |
| M0          | 0.92 | (0.82; 1.03) | 0.94   | (0.89; 1.00) |
| M1          | 0.95 | (0.83; 1.08) | 0.94   | (0.88; 0.99) |
| M2          | 0.87 | (0.77; 0.97) | 0.96   | (0.90; 1.03) |
| <b>LA</b>   |      |              |        |              |
| M0          | 1.03 | (0.90; 1.17) | 0.86   | (0.80; 0.92) |
| M1          | 1.03 | (0.90; 1.17) | 0.86   | (0.80; 0.93) |
| M2          | 0.98 | (0.86; 1.12) | 0.82   | (0.76; 0.89) |
| <b>MUFA</b> |      |              |        |              |
| M0          | 1.19 | (1.11; 1.27) | 1.04   | (0.98; 1.11) |
| M1          | 1.17 | (1.12; 1.22) | 1.04   | (0.98; 1.11) |
| M2          | 1.35 | (1.14; 1.61) | 1.18   | (1.00; 1.40) |
| <b>SFA</b>  |      |              |        |              |
| M0          | 1.12 | (1.04; 1.20) | 0.97   | (0.89; 1.05) |
| M1          | 1.11 | (1.03; 1.20) | 0.97   | (0.90; 1.05) |
| M2          | 0.93 | (0.80; 1.09) | 0.96   | (0.82; 1.12) |

Results are expressed as odds ratio (and 95% confidence interval) per standard deviation unit increase in blood fatty acids concentration. Model 0 (M0): unadjusted model; Model 1 (M1): adjusted for recruitment place, demographic and lifestyle variables (age, sex, non-European ancestry, smoking, alcohol and body mass index); Model 2 (M2): adjusted for variables in M1 plus other fatty acids. DHA: docosahexaenoic acid; LA: linoleic acid; MUFA: monounsaturated fatty acids; SFA: saturated fatty acids; CHD: coronary heart disease.

## References

1. Soininen P, Kangas AJ, Wurtz P, Tukiainen T, Tynkkynen T, Laatikainen R, Jarvelin MR, Kahonen M, Lehtimäki T, Viikari J, Raitakari OT, Savolainen MJ and Ala-Korpela M. High-throughput serum NMR metabolomics for cost-effective holistic studies on systemic metabolism. *Analyst*. 2009;134:1781-5.
2. Inouye M, Kettunen J, Soininen P, Silander K, Ripatti S, Kumpula LS, Hamalainen E, Jousilahti P, Kangas AJ, Mannisto S, Savolainen MJ, Jula A, Leiviska J, Palotie A, Salomaa V, Perola M, Ala-Korpela M and Peltonen L. Metabonomic, transcriptomic, and genomic variation of a population cohort. *Mol Syst Biol*. 2010;6:441.
3. Soininen P, Kangas AJ, Wurtz P, Suna T and Ala-Korpela M. Quantitative serum nuclear magnetic resonance metabolomics in cardiovascular epidemiology and genetics. *Circ Cardiovasc Genet*. 2015;8:192-206.
4. Kujala UM, Makinen VP, Heinonen I, Soininen P, Kangas AJ, Leskinen TH, Rahkila P, Wurtz P, Kovanen V, Cheng S, Sipila S, Hirvensalo M, Telama R, Tammelin T, Savolainen MJ, Pouta A, O'Reilly PF, Mantyselka P, Viikari J, Kahonen M, Lehtimäki T, Elliott P, Vanhala MJ, Raitakari OT, Jarvelin MR, Kaprio J, Kainulainen H and Ala-Korpela M. Long-term leisure-time physical activity and serum metabolome. *Circulation*. 2013;127:340-8.
5. Vehtari A, Makinen VP, Soininen P, Ingman P, Makela SM, Savolainen MJ, Hannuksela ML, Kaski K and Ala-Korpela M. A novel Bayesian approach to quantify clinical variables and to determine their spectroscopic counterparts in <sup>1</sup>H NMR metabolomic data. *BMC Bioinformatics*. 2007;8 Suppl 2:S8.
6. Würtz P, Kangas A, Soininen P, Lawlor D, Davey Smith G and Ala-Korpela M. Quantitative serum NMR metabolomics in large-scale epidemiology: a primer on -omic technology. *American Journal of Epidemiology*. 2017.
7. Wurtz P, Havulinna AS, Soininen P, Tynkkynen T, Prieto-Merino D, Tillin T, Ghorbani A, Artati A, Wang Q, Tiainen M, Kangas AJ, Kettunen J, Kaikkonen J, Mikkila V, Jula A, Kahonen M, Lehtimäki T, Lawlor DA, Gaunt TR, Hughes AD, Sattar N, Illig T, Adamski J, Wang TJ, Perola M, Ripatti S, Vasani RS, Raitakari OT, Gerszten RE, Casas JP, Chaturvedi N, Ala-Korpela M and Salomaa V. Metabolite profiling and cardiovascular event risk: a prospective study of 3 population-based cohorts. *Circulation*. 2015;131:774-85.
8. Higgins JP and Thompson SG. Quantifying heterogeneity in a meta-analysis. *Stat Med*. 2002;21:1539-58.
